# Supplementary material for: Zygotic vinculin is not essential for embryonic development in zebrafish
Source: PubMed Central journal article supplement (PMC5540497; doi:10.1371/journal.pone.0182278), 2017-08-02
Supplement: pone.0182278.s009.pdf [file pone.0182278.s009.pdf]

|                |    |    |    |    |    |    |    |  |
|----------------|----|----|----|----|----|----|----|--|
| Zebrafish_VclB |    |    |    |    |    |    |    |  |
| Zebrafish_VclA | 86 |    |    |    |    |    |    |  |
| Xenopus_Vcl    | 85 | 86 |    |    |    |    |    |  |
| Human_Vcl      | 86 | 87 | 90 |    |    |    |    |  |
| Mouse_Vcl      | 86 | 87 | 90 | 99 |    |    |    |  |
| Chicken_Vcl    | 86 | 88 | 90 | 95 | 95 |    |    |  |
| Drosophila_Vcl | 47 | 48 | 47 | 48 | 48 | 48 |    |  |
| C. elegans_Vcl | 46 | 45 | 45 | 46 | 46 | 46 | 51 |  |

**S1 Table. Identity Matrix of vinculin isoforms**

Identity matrix (in %) of the comparison between vinculin protein sequences of common model organisms. The matrix is based on multiple sequence alignment using Clustal Omega.
